# Supplementary material for: Significance of gene variants for the functional biogeography of the near-surface Atlantic Ocean microbiome
Source: PubMed Central journal article supplement (PMC8786918; doi:10.1038/s41467-022-28128-8), 2022-01-24
Supplement: 41467_2022_28128_MOESM1_ESM.pdf [file 41467_2022_28128_MOESM1_ESM.pdf]

# Significance of gene variants for the functional biogeography of the near-surface Atlantic Ocean microbiome

Leon Dlugosch<sup>1</sup>, Anja Poehlein<sup>2</sup>, Bernd Wemheuer<sup>2</sup>, Birgit Pfeiffer<sup>2</sup>, Thomas H.Badewien<sup>1</sup>, Rolf Daniel<sup>2</sup>, Meinhard Simon<sup>1,3</sup>

<sup>1</sup>Institute for Chemistry and Biology of the Marine Environment, University of Oldenburg,  
Carl von Ossietzky Str. 9-11, D-26129 Oldenburg, Germany

<sup>2</sup>Department of Genomic and Applied Microbiology and Göttingen Genomics Laboratory, Institute of  
Microbiology and Genetics, Georg-August University of Göttingen,  
Grisebachstr. 8, D-37077 Göttingen, Germany

<sup>3</sup> Helmholtz Institute for Functional Marine Biodiversity at the University of Oldenburg (HIFMB)  
Ammerländer Heerstraße 231, D-26129 Oldenburg, Germany

## Supplementary Information

**Table 1** Location and hydrographic properties of the stations along the transect.

**Table 2** Sequencing statistics.

**Table 3** Richness, diversity and evenness of taxa, KOs and non-redundant genes.

**Supplementary Data 1** Log-fold change (l2) and Benjamini-Hochberg adjusted p-values of differential abundance (DESeq2) analysis of selected pathways (amino acid, oligo- and monosaccharide transporters, nitrogen metabolism, vitamin B12 and B1 synthesis, photosynthesis and CAZymes) between functional profile clusters 1, 2 and 3 of the AOM. (separate Excel file)

## Supplementary Data 2

1. Taxonomy of 158 species/genomes and their temperature range, temperature of maximum abundance and lowest and highest temperature of occurrence
2. Number of variants, temperature range and standard deviation of highly abundant KOs of prominent taxa of the AOM. (separate Excel file).

**Fig. 1** Collectors curves of richness of gene sequences, KOs and taxa of the AOM.

**Fig. 2** A, Contour plots of potential temperature, salinity and density of the upper 200 m along the Atlantic Ocean transect; B, temperature-salinity plot of the water masses of the upper 200 m along the transect.

**Fig. 3** Hydrographic, biotic and biogeochemical properties of the Southern and Atlantic Ocean during the RV Polarstern cruises ANTXXVIII/4 and -/5.

**Fig. 4** Taxonomic composition of the AOM.

**Fig. 5** Determination and validation of clusters.

**Fig. 6** Differential abundance of KOs and CAZymes.

**Fig. 7** CAZyme abundance cluster dendrogram

- Fig. 8** Taxonomic breakdown of CAZyme abundances.
- Fig. 9** Normalized abundance of clusters of gene variants of prominent taxa of the AOM in the biogeographic provinces along the transect at stations 193 to 330.
- Fig. 10** Temperature ranges of prominent species of the AOM.

## Supplementary Table 1

Environmental and biotic data of stations of cruises ANTXXVIII/4 and -/5 at 20 m depth. Chl *a*: chlorophyll *a*; BPP: bacterial biomass production; POC: particulate organic carbon; TPN: total particulate nitrogen. Annual mean concentrations of phosphate and nitrate were extracted from the World Ocean Atlas 2018, provided by the National Oceanic and Atmospheric Administration (<https://www.ncei.noaa.gov/access/world-ocean-atlas-2018/>). na: not available; \*: linearly interpolated

| Station | Latitude<br>[°N] | Longitude<br>[°W] | Date       | Province | Temperature<br>[°C] | Salinity | Chl <i>a</i><br>[μg L <sup>-1</sup> ] | Prokaryotes<br>[10 <sup>6</sup> cells ml <sup>-1</sup> ] | BPP<br>[ngC L <sup>-1</sup> h <sup>-1</sup> ] | POC<br>[μg L <sup>-1</sup> ] | TPN<br>[μg L <sup>-1</sup> ] | Nitrate<br>[μM] | Phosphate<br>[μM] |
|---------|------------------|-------------------|------------|----------|---------------------|----------|---------------------------------------|----------------------------------------------------------|-----------------------------------------------|------------------------------|------------------------------|-----------------|-------------------|
| 193     | -61.717          | 55.167            | 2012-03-19 | APLR     | 1.225               | 34.195   | 0.80                                  | 8.42                                                     | 145.0                                         | 116                          | 25                           | 25.728          | 1.819             |
| 241     | -61.244          | 57.074            | 2012-03-25 | APLR     | 1.226               | 34.043   | 1.19                                  | 10.60                                                    | 21.2                                          | 114                          | 26                           | 24.709          | 1.788             |
| 287     | -60.500          | 55.500            | 2012-04-04 | ANTA     | 1.832               | 33.837   | 1.23                                  | 2.16                                                     | 18.1                                          | 148                          | 3                            | 24.881          | 1.687             |
| 179     | -57.983          | 59.867            | 2012-03-16 | ANTA     | 4.392               | 33.707   | 0.08                                  | 4.19                                                     | 13.5                                          | 38                           | 7                            | 22.146          | 1.574             |
| 178     | -56.170          | 62.633            | 2012-03-16 | SANT     | 6.981               | 33.979   | 0.35                                  | 8.51                                                     | na                                            | 61                           | 12                           | 16.317*         | 1.548             |
| 296     | -51.054          | 66.459            | 2012-04-11 | FKLD     | 8.148               | 33.001   | 0.40                                  | 12.90                                                    | 70.0                                          | 83                           | 14                           | 10.488          | 1.280             |
| 297     | -47.941          | 61.923            | 2012-04-12 | FKLD     | 10.344              | 33.492   | 0.57                                  | 19.00                                                    | 233.2                                         | 105                          | 22                           | 12.017          | 1.049             |
| 300     | -39.798          | 50.577            | 2012-04-15 | SATL     | 19.484              | 35.311   | 0.30                                  | 8.04                                                     | 186.4                                         | 60                           | 11                           | 3.901           | 0.455             |
| 302     | -34.239          | 42.965            | 2012-04-17 | SATL     | 22.131              | 35.843   | 0.15                                  | 5.36                                                     | 152.8                                         | 42                           | 6                            | 0.040           | 0.010             |
| 308     | -21.229          | 35.402            | 2012-04-21 | SATL     | 27.149              | 37.316   | 0.10                                  | 6.39                                                     | 98.7                                          | 33                           | 6                            | 0.554           | 0.059             |
| 310     | -18.664          | 33.725            | 2012-04-22 | SATL     | 27.371              | 37.394   | 0.11                                  | 7.53                                                     | 256.5                                         | 37                           | 6                            | 0.126           | 0.094             |
| 311     | -15.522          | 31.862            | 2012-04-23 | SATL     | 26.882              | 37.240   | 0.08*                                 | 5.93                                                     | na                                            | 33.5*                        | na                           | 0.247           | 0.029             |
| 312     | -11.898          | 29.752            | 2012-04-24 | SATL     | 27.270              | 37.014   | 0.06                                  | 6.26                                                     | 163.0                                         | 30                           | 6                            | 0.300           | 0.096*            |
| 313     | -8.211           | 27.991            | 2012-04-25 | SATL     | 28.012              | 36.285   | 0.09                                  | 7.88                                                     | 276.1                                         | 34                           | 6                            | 0.050           | 0.162             |
| 315     | -1.487           | 25.318            | 2012-04-27 | WRTA     | 27.826              | 35.977   | 0.33                                  | 8.66                                                     | 178.5                                         | 57                           | 11                           | 0.038           | 0.064             |
| 319     | 12.590           | 22.196            | 2012-05-01 | NATR     | 22.923              | 35.776   | 0.72                                  | 12.90                                                    | 191.9                                         | 60.5*                        | na                           | 0.155*          | 0.157             |
| 320     | 16.904           | 21.569            | 2012-05-02 | NATR     | 21.415              | 36.206   | 0.51                                  | 6.94                                                     | 351.4                                         | 64                           | 12                           | 0.272           | 0.141             |
| 321     | 20.705           | 21.170            | 2012-05-03 | NATR     | 20.770              | 36.815   | 0.45                                  | 9.78                                                     | 102.1                                         | 71                           | 14                           | 0.855           | 0.098             |
| 324     | 33.398           | 13.534            | 2012-05-07 | NAST     | 17.787              | 36.606   | 0.15                                  | 7.22                                                     | 134.8                                         | 54                           | 9                            | 0.885*          | 0.076*            |
| 326     | 35.239           | 12.897            | 2012-05-08 | NAST     | 17.918              | 36.619   | 0.21                                  | 6.27                                                     | 110.2                                         | 65                           | 9                            | 0.915*          | 0.053             |
| 329     | 43.042           | 10.935            | 2012-05-10 | NADR     | 13.744              | 35.786   | 0.74                                  | 10.50                                                    | 108.8                                         | 101                          | 19                           | 0.945           | 0.067             |
| 330     | 47.0438          | 8.0905            | 2012-05-11 | NADR     | 12.579              | 35.6486  | 1.90                                  | 14.90                                                    | 373.0                                         | 254                          | 52                           | 3.179           | 0.234             |

## Supplementary Table 2

Statistics of sequencing, assembly and ORF-prediction of the AOM samples of all stations visited and analyzed. \*: based on contigs  $\geq 210$  bp contigs and ORFs, \*\*: based on contigs  $\geq 500$  bp, \*\*\* genes not included in OM-RGC\_v2 (for details see materials and methods of the publication).

| <i>Station</i> | <i>Total bp</i> | <i>Joined reads</i> | <i>Contigs*</i> | <i>Contigs**</i> | <i>N50**</i> | <i>Total assembly length [bp]*</i> | <i>Largest contig [bp]</i> | <i>Predicted ORFs</i> | <i>Novel genes***</i> | <i>Mapped reads</i> |
|----------------|-----------------|---------------------|-----------------|------------------|--------------|------------------------------------|----------------------------|-----------------------|-----------------------|---------------------|
| <b>193</b>     | 7,435,000,546   | 12,427,245          | 1,501,196       | 183,054          | 1,654        | 606,362,663                        | 115,786                    | 417,100               | 46,554                | 9,510,812           |
| <b>241</b>     | 6,071,598,618   | 10,027,320          | 962,824         | 116,387          | 1,571        | 387,239,824                        | 325,929                    | 268,873               | 47,990                | 7,301,266           |
| <b>287</b>     | 6,322,636,050   | 9,471,523           | 1,434,266       | 183,574          | 1,126        | 555,042,209                        | 258,892                    | 333,526               | 121,003               | 6,166,447           |
| <b>179</b>     | 6,198,682,756   | 7,599,385           | 971,371         | 143,473          | 1,874        | 436,536,877                        | 262,003                    | 290,543               | 29,190                | 6,139,726           |
| <b>178</b>     | 6,064,805,297   | 8,176,910           | 1,300,260       | 130,039          | 1,509        | 486,212,585                        | 306,237                    | 287,516               | 33,687                | 5,937,808           |
| <b>296</b>     | 19,592,095,808  | 26,002,512          | 2,505,074       | 427,057          | 1,894        | 1,203,911,331                      | 256,578                    | 100,1702              | 173,277               | 21,787,506          |
| <b>297</b>     | 6,616,159,289   | 9,041,391           | 1,357,387       | 198,801          | 1,617        | 585,795,325                        | 162,636                    | 441,554               | 54,874                | 7,343,246           |
| <b>300</b>     | 6,792,243,498   | 12,739,153          | 1,582,103       | 360,444          | 877          | 780,657,750                        | 143,583                    | 567,271               | 48,919                | 9,788,569           |
| <b>302</b>     | 5,503,346,589   | 11,099,908          | 1,398,405       | 322,151          | 807          | 675,992,337                        | 81,215                     | 258,162               | 18,012                | 7,599,287           |
| <b>308</b>     | 4,841,364,911   | 8,620,757           | 1,087,405       | 263,756          | 1,044        | 578,609,656                        | 152,476                    | 388,272               | 24,475                | 6,361,388           |
| <b>310</b>     | 6,517,496,619   | 11,188,810          | 1,220,934       | 292,443          | 1,033        | 637,971,540                        | 93,510                     | 494,727               | 29,117                | 8,857,004           |
| <b>311</b>     | 7,559,399,537   | 11,548,284          | 1,276,149       | 323,727          | 1,029        | 676,526,273                        | 154,832                    | 549,470               | 33,950                | 9,604,172           |
| <b>312</b>     | 4,447,667,609   | 7,750,178           | 1,055,905       | 241,878          | 1,040        | 550,785,256                        | 125,412                    | 368,056               | 36,673                | 5,431,202           |
| <b>313</b>     | 7,892,259,228   | 13,906,649          | 1,416,050       | 310,566          | 1,068        | 729,545,280                        | 782,123                    | 548,478               | 40,407                | 10,839,614          |
| <b>315</b>     | 6,949,599,597   | 12,187,168          | 1,305,054       | 309,827          | 1,028        | 684,170,427                        | 659,572                    | 520,142               | 30,874                | 9,499,620           |
| <b>319</b>     | 6,984,066,868   | 12,396,808          | 1,352,845       | 342,885          | 1,114        | 742,215,671                        | 144,779                    | 593,845               | 69,417                | 10,138,608          |
| <b>320</b>     | 7,501,417,624   | 12,965,323          | 1,325,747       | 337,799          | 1,102        | 725,591,569                        | 889,385                    | 556,011               | 63,999                | 10,668,816          |
| <b>321</b>     | 8,541,115,749   | 14,587,332          | 1,751,299       | 451,148          | 1,027        | 942,741,816                        | 659,617                    | 699,588               | 76,855                | 11,603,701          |
| <b>324</b>     | 5,304,775,998   | 13,853,045          | 717,695         | 140,680          | 890          | 341,757,754                        | 538,303                    | 325,162               | 19,512                | 9,635,236           |
| <b>326</b>     | 21,965,269,770  | 33,849,158          | 3,428,669       | 841,029          | 1,150        | 1,867,599,514                      | 266,735                    | 1,291,360             | 469,340               | 26,396,598          |
| <b>329</b>     | 16,064,549,937  | 22,926,879          | 2,629,046       | 598,340          | 1,064        | 1,381,208,536                      | 157,398                    | 859,230               | 167,630               | 18,165,412          |
| <b>330</b>     | 21,005,691,360  | 28,029,489          | 3,151,195       | 724,155          | 1,115        | 1,675,633,057                      | 264,112                    | 996,361               | 350,612               | 21,744,446          |

### Supplementary Table 3

Richness and inv. Shannon index of taxa, KEGG orthologues and non-redundant gene sequences of the samples of all stations visited. Prior to analysis samples were rarefied to 2 Million reads per sample.

| Station | Taxon Richness | Taxon Inv. Shannon index | Taxon Evenness | KO Richness | KO Inv. Shannon index | KO Evenness | nr-sequence Richness | nr-sequence Inv. Shannon index | nr-sequence Evenness |
|---------|----------------|--------------------------|----------------|-------------|-----------------------|-------------|----------------------|--------------------------------|----------------------|
| 193     | 11,279         | 281.6560                 | 0.604530       | 7,636       | 2077.083              | 0.854383    | 388,767              | 152097.8                       | 0.927086             |
| 241     | 9,234          | 426.9284                 | 0.663328       | 6,227       | 1566.834              | 0.842063    | 233,580              | 68220.0                        | 0.900432             |
| 287     | 10,346         | 449.3945                 | 0.660717       | 6,986       | 1661.252              | 0.837733    | 239,732              | 67701.5                        | 0.897926             |
| 179     | 10,091         | 383.3060                 | 0.645252       | 6,510       | 1590.384              | 0.839500    | 243,101              | 76958.2                        | 0.907246             |
| 178     | 10,185         | 260.4246                 | 0.602721       | 6,863       | 1535.687              | 0.830520    | 275,340              | 85570.1                        | 0.906699             |
| 296     | 12,480         | 548.7825                 | 0.668764       | 8,045       | 1972.917              | 0.843704    | 430,193              | 165089.4                       | 0.926168             |
| 297     | 11,931         | 543.4357                 | 0.670926       | 7,927       | 1877.380              | 0.839564    | 437,563              | 185316.7                       | 0.933855             |
| 300     | 12,705         | 328.3156                 | 0.613135       | 8,079       | 1881.473              | 0.838034    | 725,790              | 379280.4                       | 0.951909             |
| 302     | 12,196         | 285.3285                 | 0.600885       | 6,989       | 1509.619              | 0.826879    | 554,253              | 193322.5                       | 0.920361             |
| 308     | 11,841         | 347.0930                 | 0.623669       | 6,388       | 1442.888              | 0.830205    | 468,850              | 160741.2                       | 0.918021             |
| 310     | 11,648         | 240.7508                 | 0.585691       | 6,263       | 1412.486              | 0.829646    | 467,964              | 146765.4                       | 0.911187             |
| 311     | 11,301         | 231.7185                 | 0.583492       | 5,736       | 1358.304              | 0.833552    | 451,703              | 152627.7                       | 0.916670             |
| 312     | 11,018         | 278.3843                 | 0.604795       | 6,418       | 1446.299              | 0.830031    | 369,173              | 126256.2                       | 0.916300             |
| 313     | 11,651         | 235.5073                 | 0.583323       | 6,182       | 1473.013              | 0.835689    | 460,697              | 140057.5                       | 0.908693             |
| 315     | 11,976         | 355.6772                 | 0.625518       | 6,821       | 1631.444              | 0.837950    | 507,783              | 198160.1                       | 0.928376             |
| 319     | 11,801         | 453.9574                 | 0.652522       | 7,778       | 1652.684              | 0.827114    | 548,276              | 260992.7                       | 0.943828             |
| 320     | 11,760         | 503.3809                 | 0.663790       | 8,033       | 1975.159              | 0.843971    | 501,941              | 191934.0                       | 0.926763             |
| 321     | 12,515         | 446.4145                 | 0.646683       | 8,134       | 1810.951              | 0.833159    | 628,164              | 298974.2                       | 0.944389             |
| 324     | 11,560         | 208.3869                 | 0.570735       | 7,895       | 1655.606              | 0.825934    | 577,276              | 215905.7                       | 0.925865             |
| 326     | 12,090         | 324.2307                 | 0.615040       | 8,762       | 2167.087              | 0.846110    | 557,520              | 240720.6                       | 0.936524             |
| 329     | 11,705         | 364.6921                 | 0.629718       | 8,318       | 2096.678              | 0.847325    | 528,128              | 222835.0                       | 0.934515             |
| 330     | 11,321         | 275.1644                 | 0.601791       | 8,091       | 2460.928              | 0.867732    | 422,390              | 150352.0                       | 0.920258             |

For Supplementary Data 1 and 2 see extra Excel files.

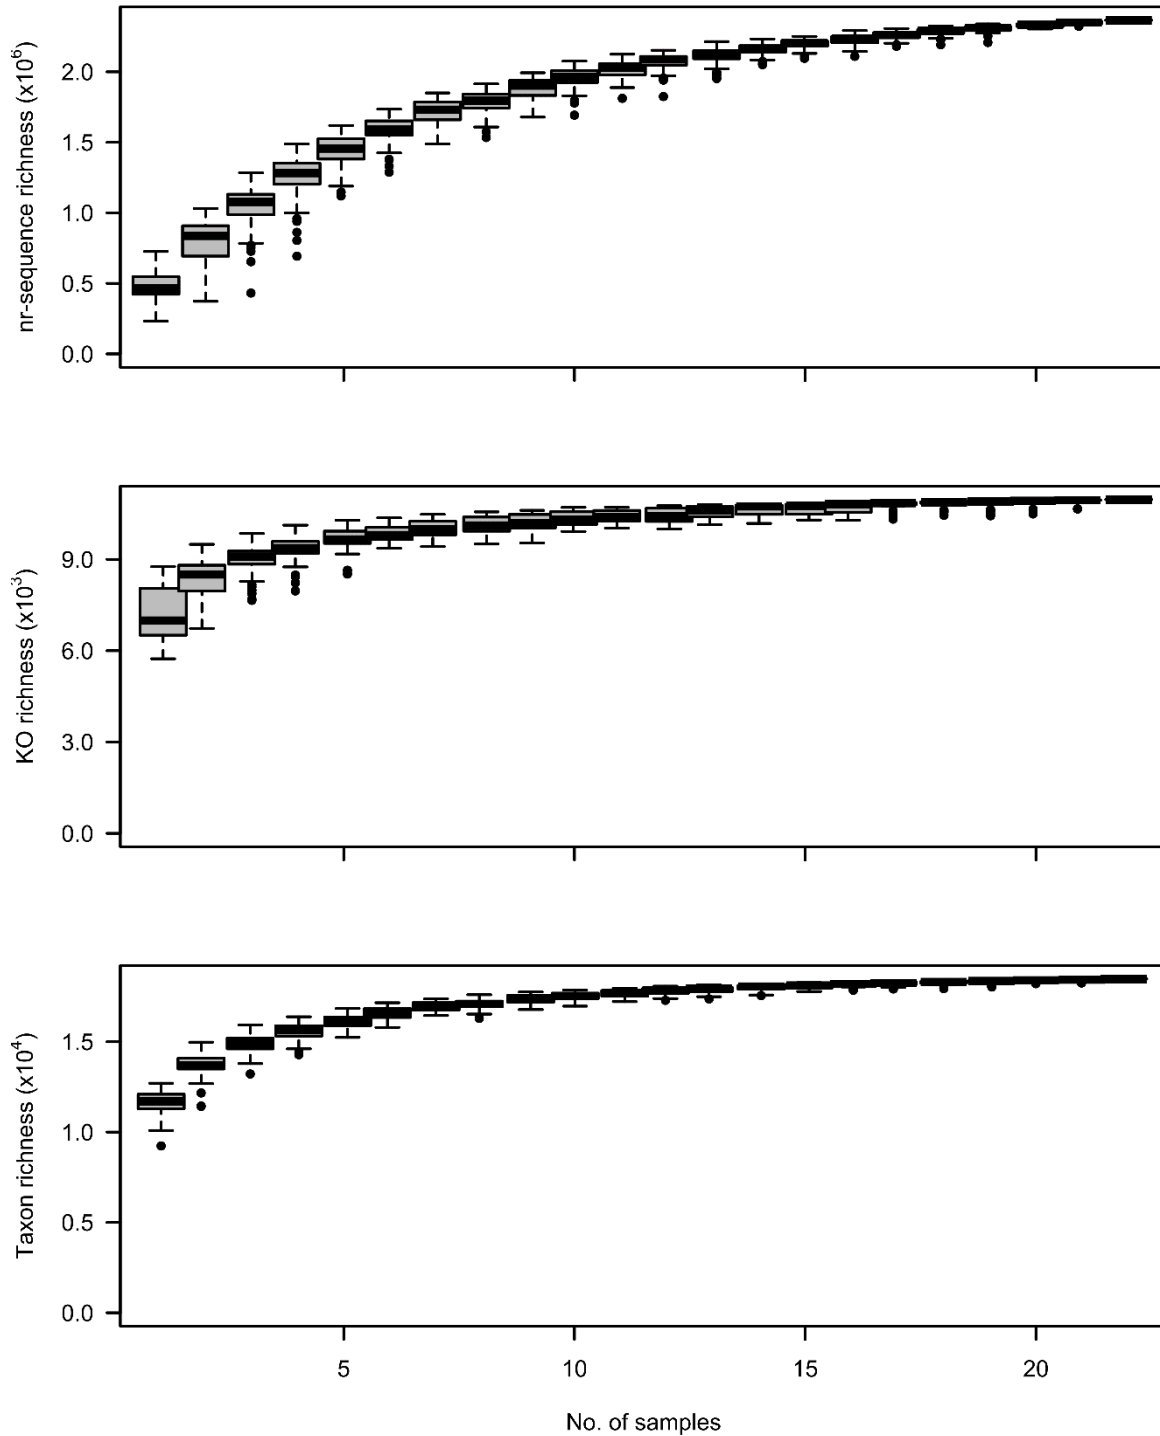

**Supplementary Figure 1: Collectors curves of richness of non-redundant (nr) gene sequences, KEGG orthologues (KO) and taxa.** For the calculation of collectors curves only taxonomically and functionally classified genes were from 22 samples were used. Samples of nr-sequence, KO and taxonomic profile were rarefied to 2 Million reads prior to collectors curve calculation (100 permutations). Median values represented by vertical lines, interquartile ranges shown as boxes, whiskers extending up to 1.5 times the interquartile range and points show outliers

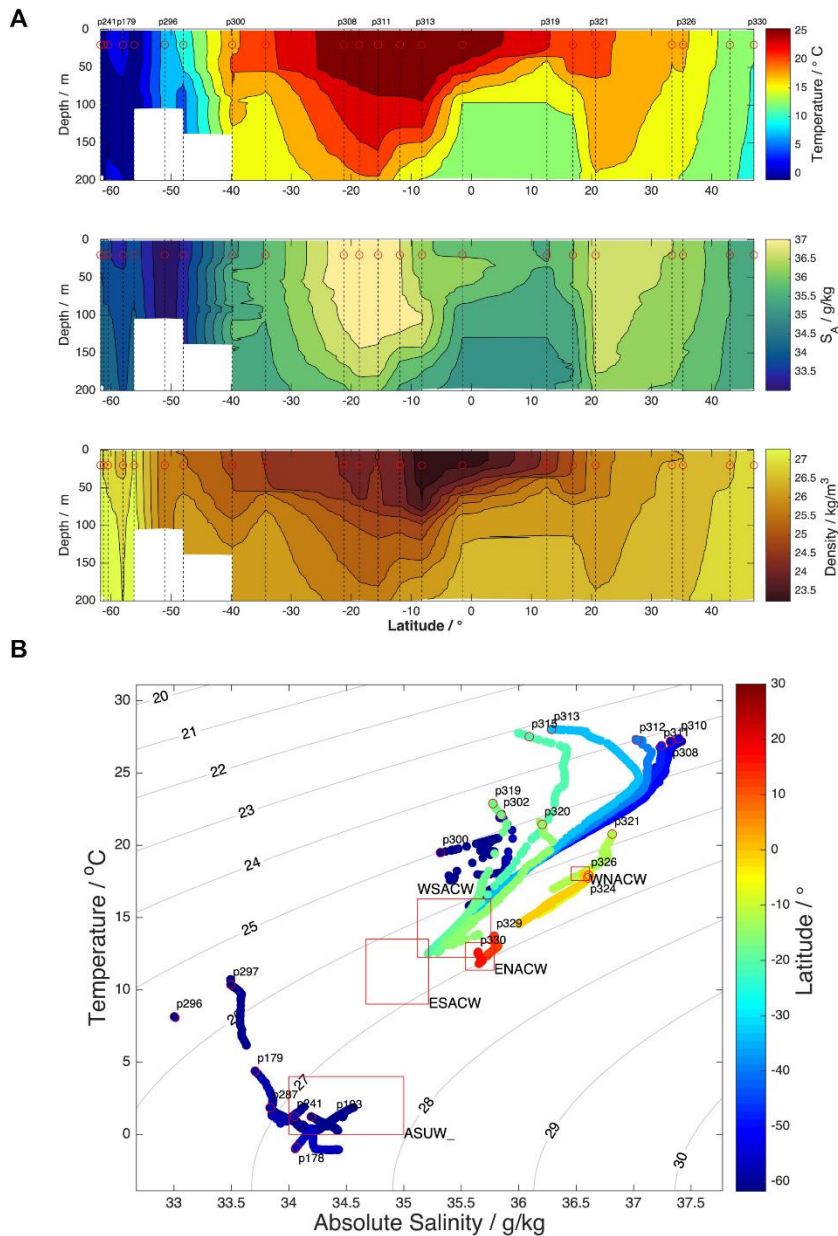

**Supplementary Figure 2: Contour plots of hydrographic features and temperature versus salinity of the water masses of the upper 200 m along the transect of RV Polarstern cruises ANTXXVIII/4 and -/5** **A:** Contour plots of potential temperature, salinity and density of the upper 200 m along the transect of the Southern and Atlantic Ocean between 62°S and 47°N investigated for the AOM. Plots are based on continuous measurements of the CTD probes at the visited stations (vertical dotted lines). Numbers above panel A indicate stations. Red circles mark the depth of sampling (20 m). **B:** Temperature-salinity plot of the water masses of the upper 200 m along this transect. Color code indicates latitude from 62°S to 47°N and numbers the stations visited (for details see Table S1). Red squares identify major water masses in the Atlantic and Southern Ocean. AASW: Antarctic Surface Water; ACW: Antarctic Circumpolar Water; WW: Winter Water; ESACW: East South Atlantic Central Water; ENACW: East North Atlantic Central Water; WNACW: Western North Atlantic Central Water; WSACW; Western South Atlantic Central Water.

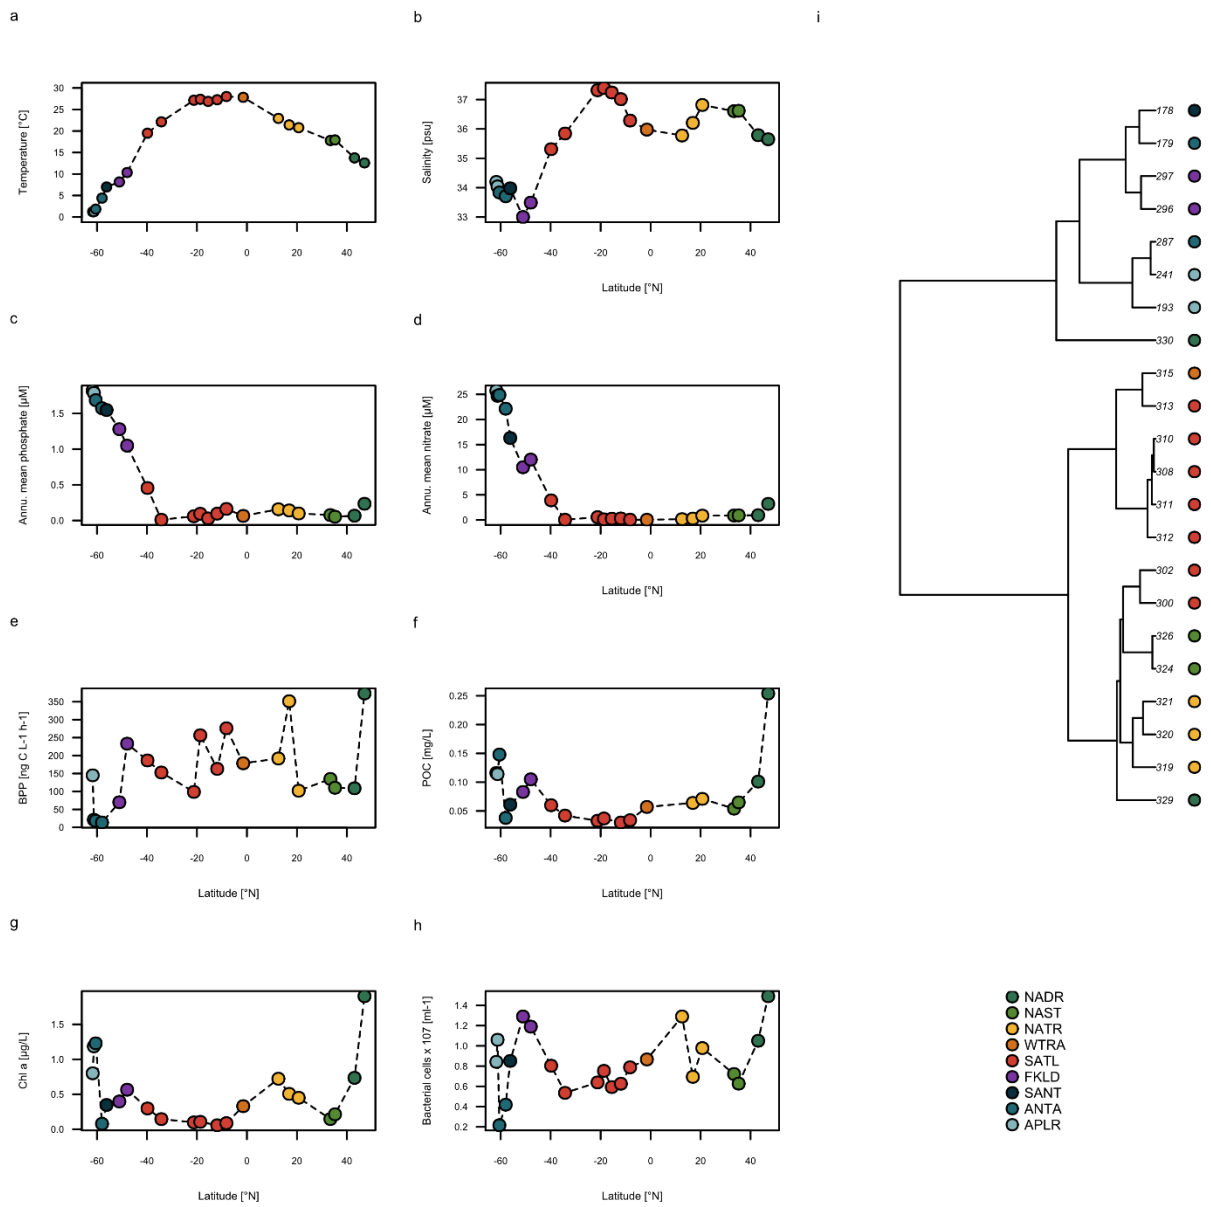

**Supplementary Figure 3: Hydrographic, biotic and biogeochemical properties in the Southern and Atlantic Ocean during cruises ANTXXVIII/4 and -/5 with RV Polarstern. a-h:** Temperature, salinity, annual mean phosphate, annual mean nitrate, bacterial biomass production, Particulate organic carbon (POC) chlorophyll *a* (Chl *a*) and bacterial cell counts at stations 193 to 330 along the Southern and Atlantic Ocean transect from 62°S to 47°N. **i:** Cluster analysis of stations 193 to 330 along the Southern and Atlantic Ocean transect from 62°S to 47°N considering in situ temperature, salinity and Chl *a* to identify oceanic provinces according to their hydrographic properties and position. For location details of stations see Fig. 1 and Table S1.



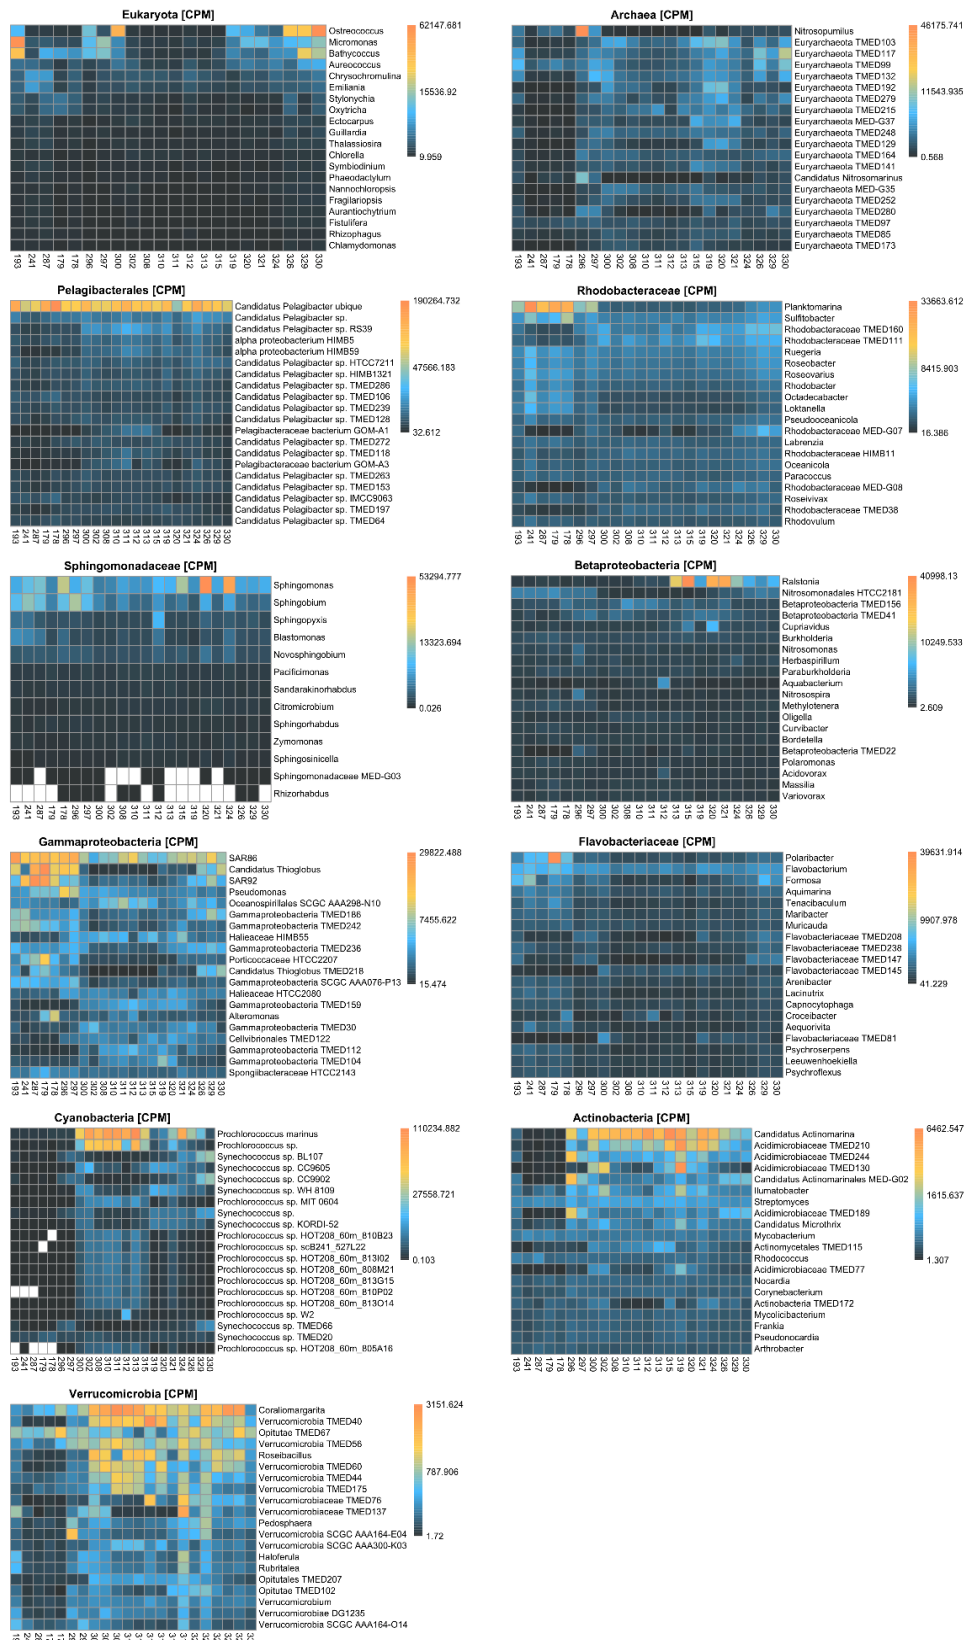

**Supplementary Figure 4: Taxonomic composition of the AOM.** Major phylogenetic groups and sublineages of these groups 193 to 300 between 62°S and 47°N. For location of stations see Fig. 1 and Table S1.

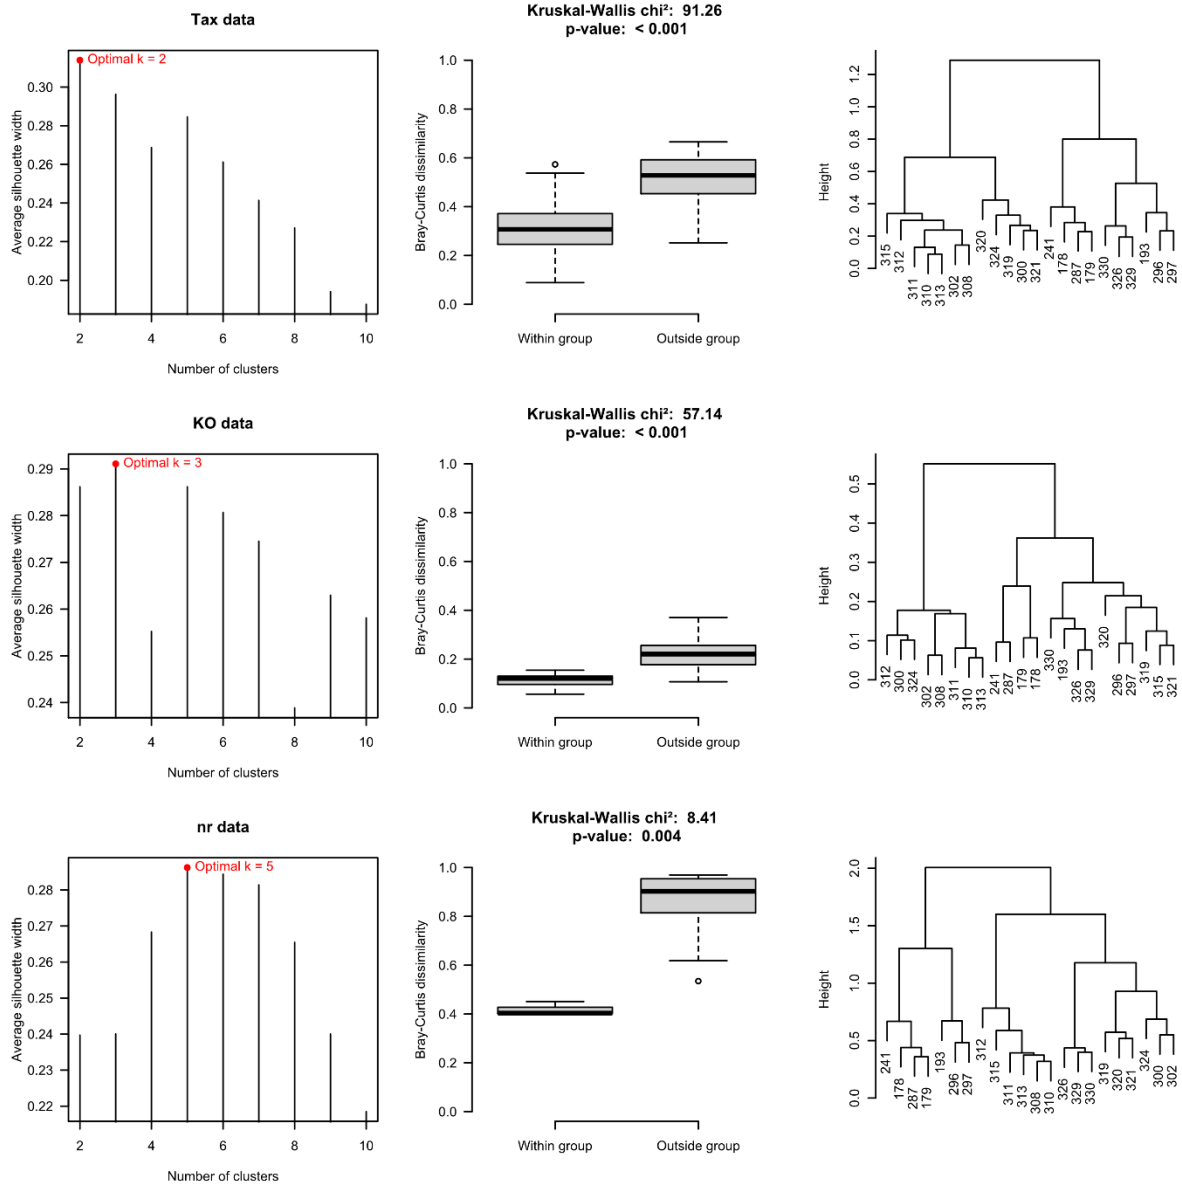

**Supplementary Figure 5: Determination and validation of clusters.** Optimal number of clusters determined by clusters silhouette coefficient. For validation, within cluster Bray-Curtis dissimilarity and distance to samples not included in clusters were tested using the non-parametric Kruskal-Wallis test. Median values represented by vertical lines, interquartile ranges shown as boxes, whiskers extending up to 1.5 times the interquartile range and points show outliers

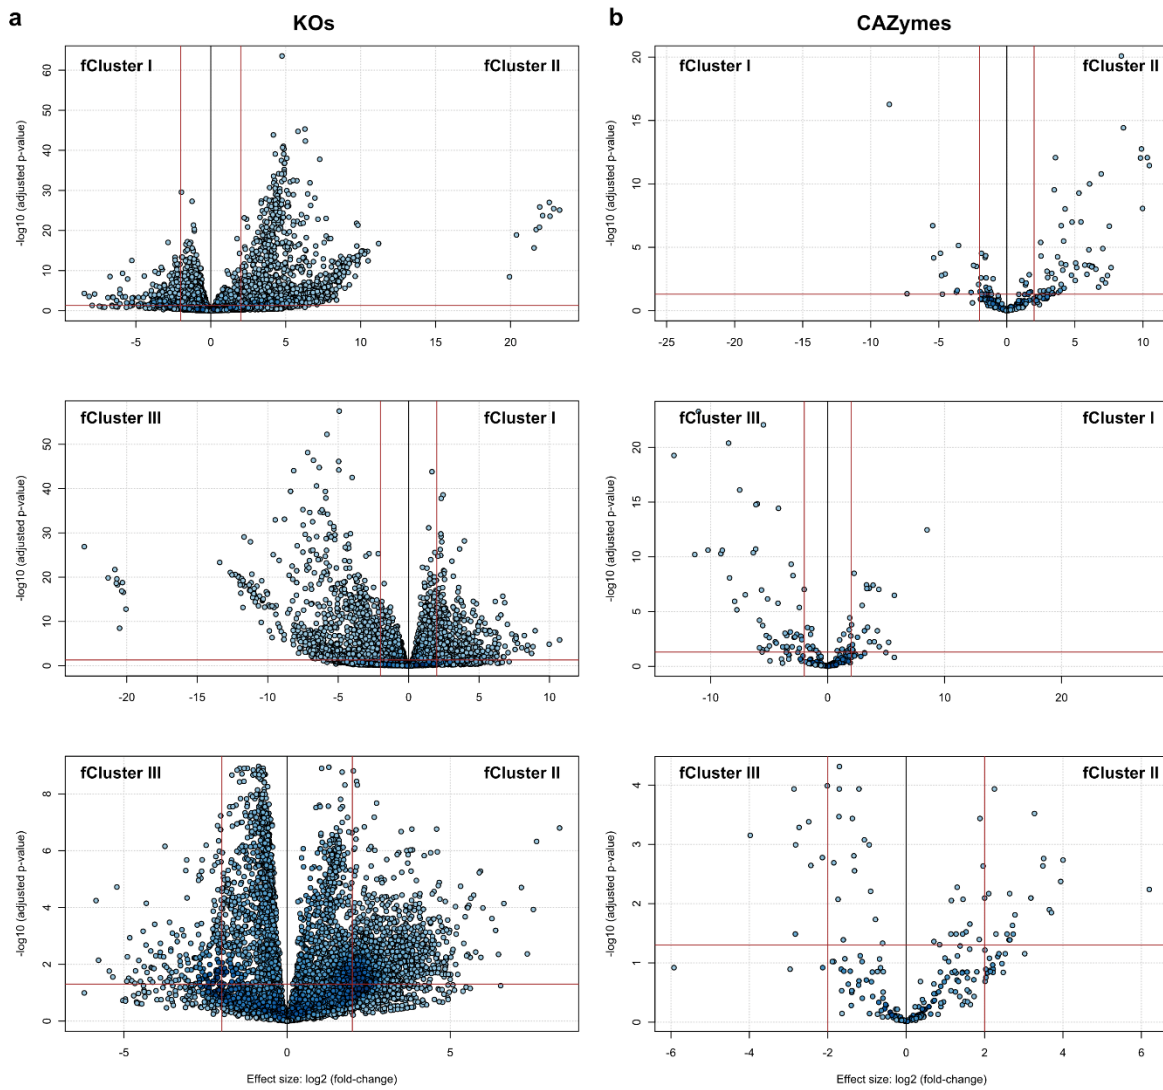

**Supplementary Figure 6: Differential abundance of KOs and CAZymes** Differential abundance of KOs and CAZymes between functional clusters of the AOM determined using DESeq2. Red lines indicate a Benjamini-Hochberg adjusted p-value  $\leq 0.05$  and a log<sub>2</sub>-fold change  $\geq 2$



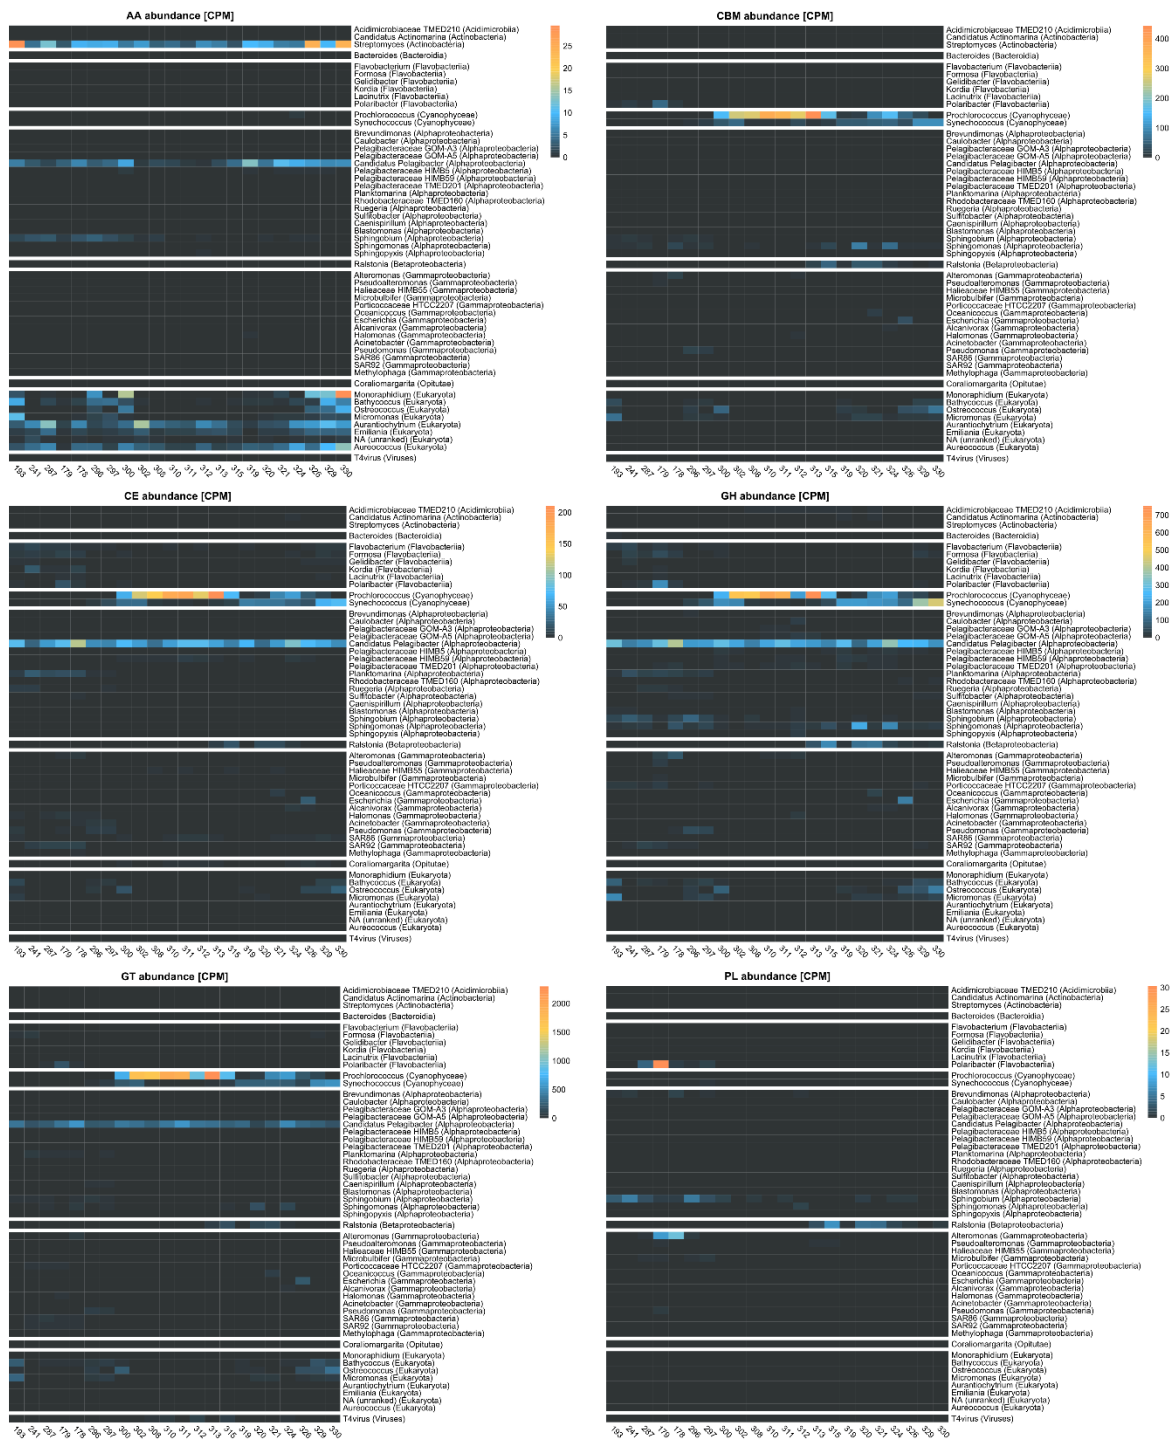

**Supplementary Figure 8: Taxonomic breakdown of CAZyme abundances** (AA: Auxiliary Activities, CBM: Carbohydrate Binding Modules, CE: Carbohydrate Esterases, GH: Glycoside Hydrolases, GT: Glycoside Transferases, PL: Polysaccharide Lyases) at stations 193 to 330 along the Southern and Atlantic Ocean transect between 62°S and 47°N. Data are given in counts per million (CPM) per station. For stations details see Fig. 1 and Supplementary Table 1.

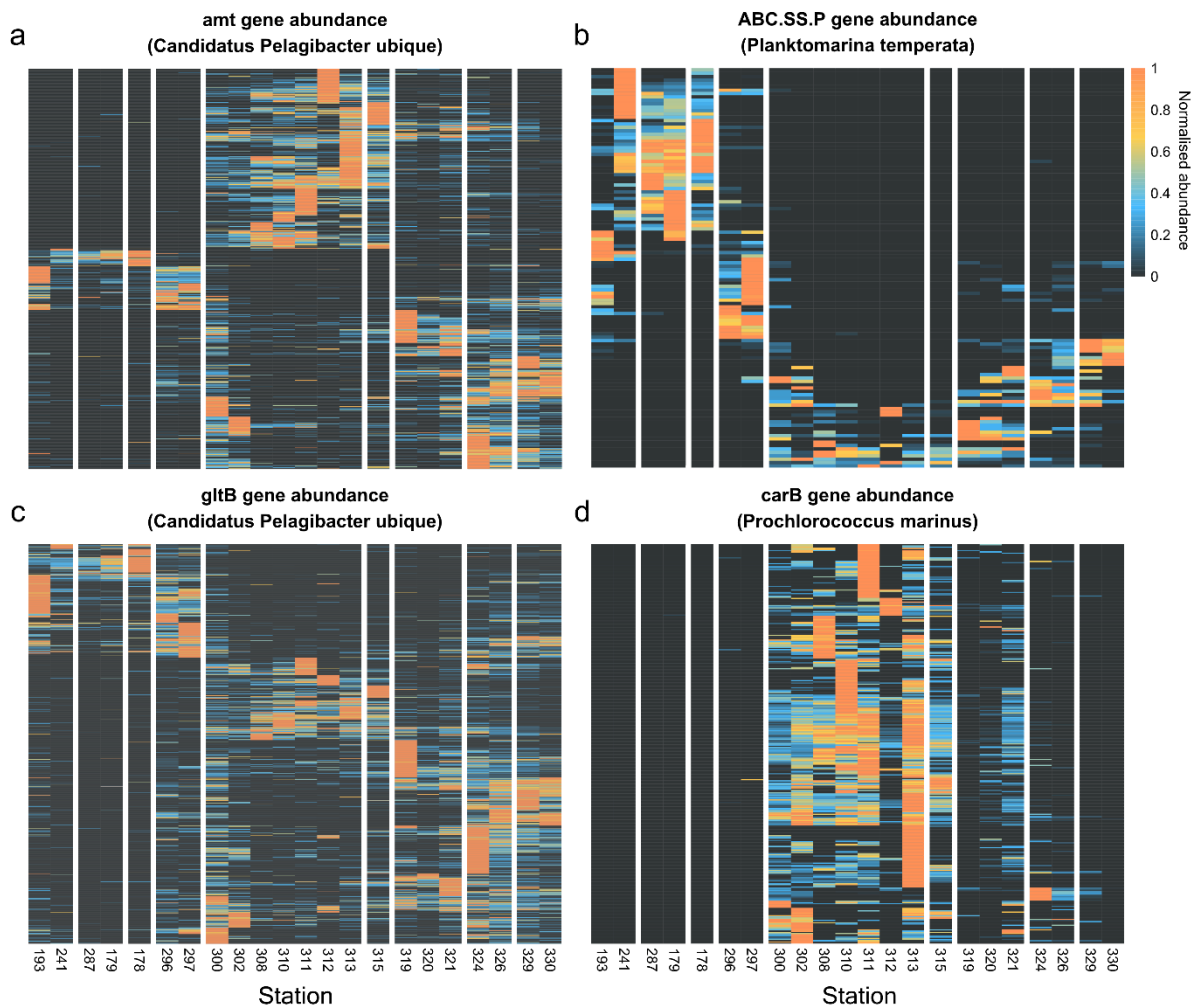

**Supplementary Figure 9: Normalized abundance of clusters of gene variants of prominent taxa of the AOM in the biogeographic provinces along the transect at stations 193 to 330. a**, Ammonium transporter of *Cand. Pelagibacter ubique* (K03320 (*amt*); **b**, ABC sugar transporter (K02057/*ABC.SS.P*) of *Planktomarina temperata*; **c**, Glutamate synthase of *Cand. Pelagibacter ubique* (large subunit K00265 (*gltB*); **d**: carbamoyl-phosphate-synthase (large subunit, K01955/*carB*) of the pyrimidine metabolism of *Prochlorococcus marinus*; Gaps delineate biogeographic provinces. For station details see Fig. 1 and Table S1.

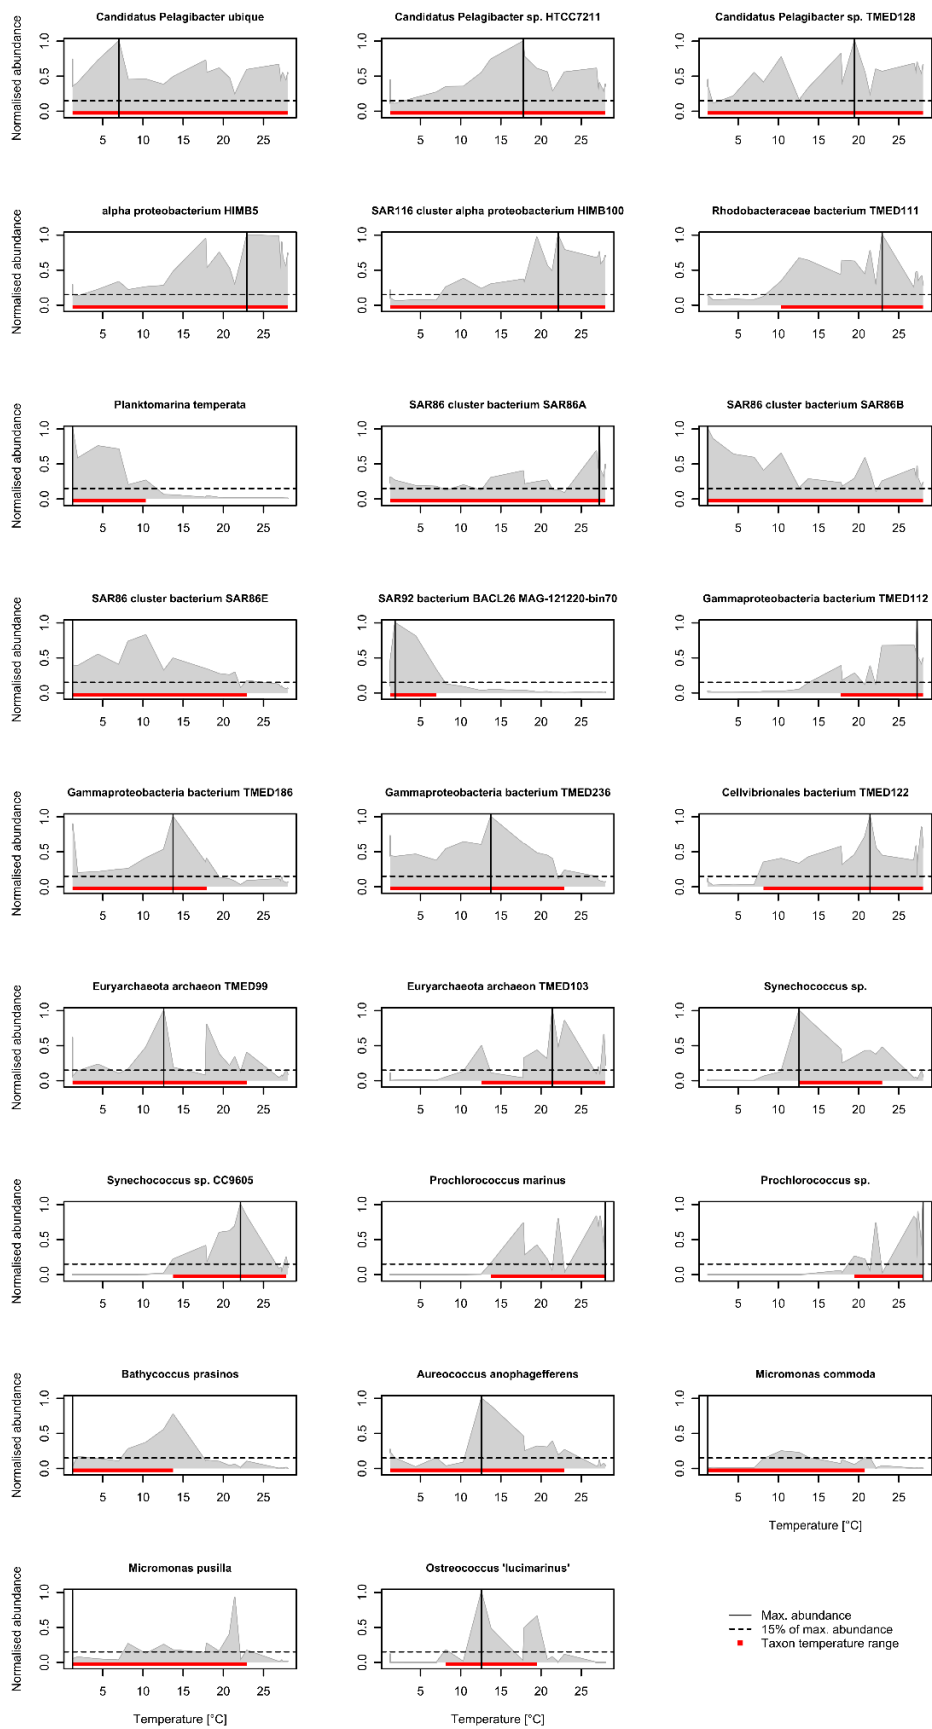

**Supplementary Figure 10: Temperature ranges of prominent species of the AOM.** Temperature range is defined as the temperature at which species occur with at least 15% of highest sequence abundance of the species-specific variants. Red bar indicates taxon temperature range in the AOM dataset considering this 15% rule.
